# Supplementary material for: Novel Amphiphilic Block Copolymers for the Formation of Stimuli-Responsive Non-Lamellar Lipid Nanoparticles
Source: MDPI journal article supplement (doi:10.3390/molecules26123648), 2021-06-15
Supplement: s1 [file s1]

## Supplementary Information

### **Novel amphiphilic block copolymers for the formation of stimuli-responsive non-lamellar lipid nanoparticles**

Jiali Zhai,<sup>1\*</sup> Bo Fan,<sup>2</sup> San H. Thang,<sup>2</sup> Calum J. Drummond<sup>1\*</sup>

<sup>1</sup>School of Science, STEM College, RMIT University, Melbourne, Vic 3000, Australia

<sup>2</sup>School of Chemistry, Monash University, Clayton, Vic 3800, Australia

#### **Additional methods**

##### *Dynamic light scattering*

Nanoparticle hydrodynamic diameter and polydispersity index (PDI) were measured using a Malvern Zetasizer plate reader based on a dynamic light scattering (DLS) method. Nanoparticles were diluted 20 times and measured in 96-well plates at 25 °C. Triplicate measurements with a minimum of 12 runs for each measurement were performed for each sample and the results were recorded in Table S2.



**Table S1.** Visual examination of the MO nanoparticles stabilized by the synthetic ABCs added at various concentrations.

| mol% | ABC1        | ABC2                  | ABC3        | ABC4        | ABC5        | ABC6  |
|------|-------------|-----------------------|-------------|-------------|-------------|-------|
| 0.5  | Milky       | Milky with aggregates | Milky       | Milky       | Milky       | Milky |
| 1.0  | Milky       | Milky                 | Milky       | Milky       | Milky       | Milky |
| 1.5  | Translucent | Milky                 | Milky       | Milky       | Milky       | Milky |
| 2.0  | Translucent | Milky                 | Milky       | Translucent | Milky       | Milky |
| 2.5  | Translucent | Milky                 | Milky       | Translucent | Translucent | Milky |
| 3.0  | Translucent | Translucent           | Translucent | Translucent | Translucent | Milky |

**Table S2.** Z-average hydrodynamic size (nm) and polydispersity index (PDI) of the MO nanoparticles stabilized by the synthetic ABCs.

| mol% | ABC1      |           | ABC2      |           | ABC3      |           | ABC4      |           | ABC5      |           | ABC6      |           |
|------|-----------|-----------|-----------|-----------|-----------|-----------|-----------|-----------|-----------|-----------|-----------|-----------|
|      | Size (nm) | PDI       |
| 0.5  | 211±2     | 0.15±0.03 | 301±11    | 0.38±0.02 | 241±2     | 0.15±0.03 | 295±2     | 0.18±0.03 | 273±5     | 0.14±0.03 | 217±3     | 0.17±0.03 |
| 1.0  | 173±2     | 0.23±0.03 | 167±2     | 0.16±0.03 | 230±3     | 0.14±0.04 | 213±2     | 0.15±0.03 | 175±3     | 0.13±0.05 | 224±5     | 0.20±0.03 |
| 1.5  | 156±1     | 0.18±0.02 | 160±1     | 0.13±0.01 | 222±2     | 0.17±0.02 | 163±1     | 0.14±0.03 | 190±1     | 0.14±0.03 | 273±8     | 0.25±0.03 |
| 2.0  | 174±6     | 0.23±0.01 | 176±3     | 0.13±0.05 | 245±3     | 0.19±0.02 | 158±3     | 0.10±0.03 | 209±4     | 0.13±0.02 | 222±3     | 0.24±0.01 |
| 2.5  | 160±2     | 0.18±0.04 | 192±2     | 0.12±0.03 | 239±4     | 0.24±0.01 | 156±2     | 0.08±0.05 | 204±2     | 0.19±0.01 | 244±3     | 0.31±0.06 |
| 3.0  | 157±2     | 0.18±0.03 | 202±1     | 0.17±0.02 | 215±3     | 0.21±0.01 | 186±4     | 0.07±0.02 | 141±1     | 0.22±0.01 | 180±4     | 0.29±0.01 |

Note: Results are given as average ± standard deviation based on three independent measurements.



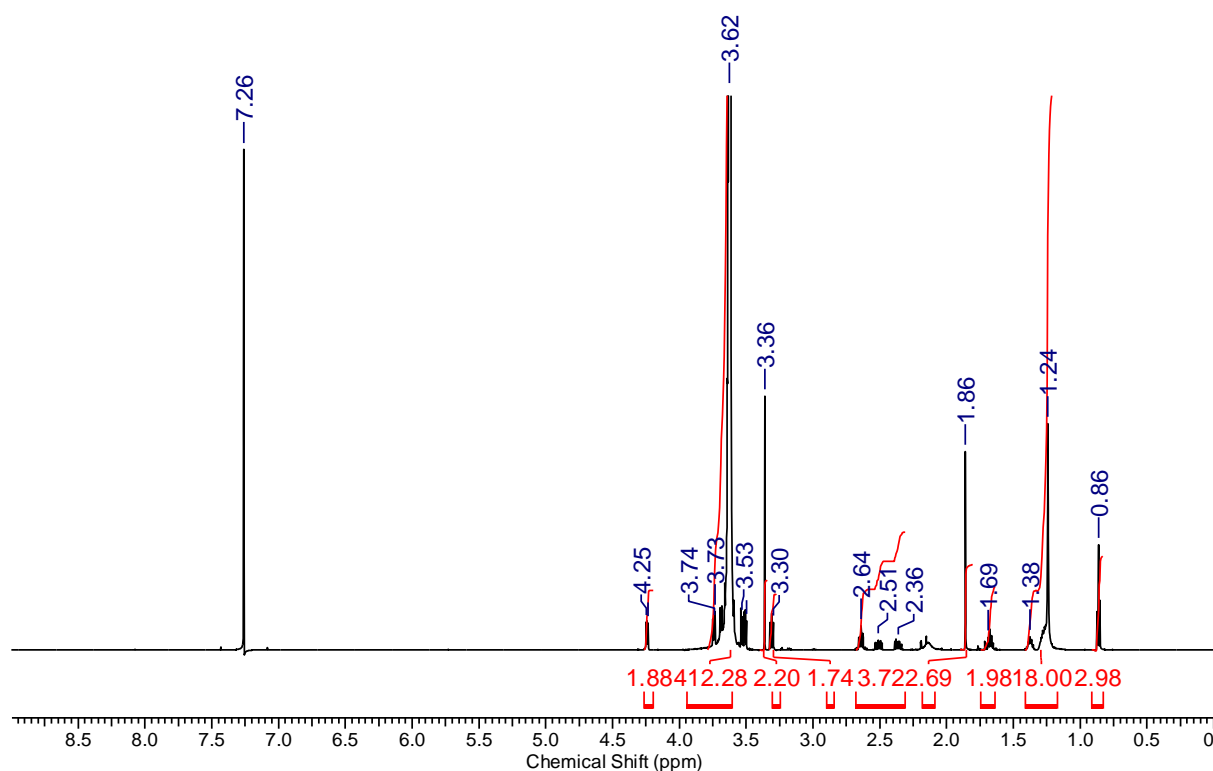

**Figure S1.**  $^1\text{H}$  NMR spectrum (400 MHz,  $\text{CDCl}_3$ ) of ABC1 ( $\text{PEG}_{114}$ -RAFT).

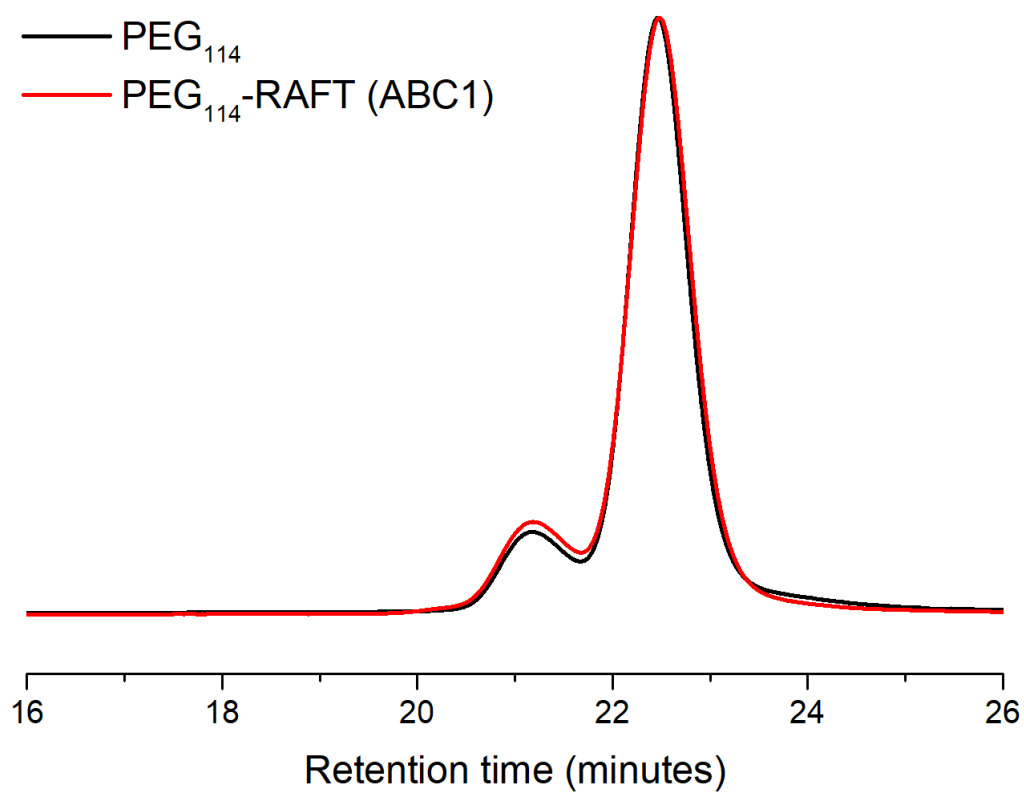

**Figure S2.** GPC traces of commercial  $\text{PEG}_{114}$  ( $M_n = 12,200$  g/mol,  $\bar{D} = 1.08$ ) and  $\text{PEG}_{114}$ -RAFT (ABC1,  $M_n = 12,300$  g/mol,  $\bar{D} = 1.08$ ) (DMF GPC, PMMA standards). *Note: the shoulder peak comes from the small amount of  $\text{PEG}_{228}$  in the commercial source.*



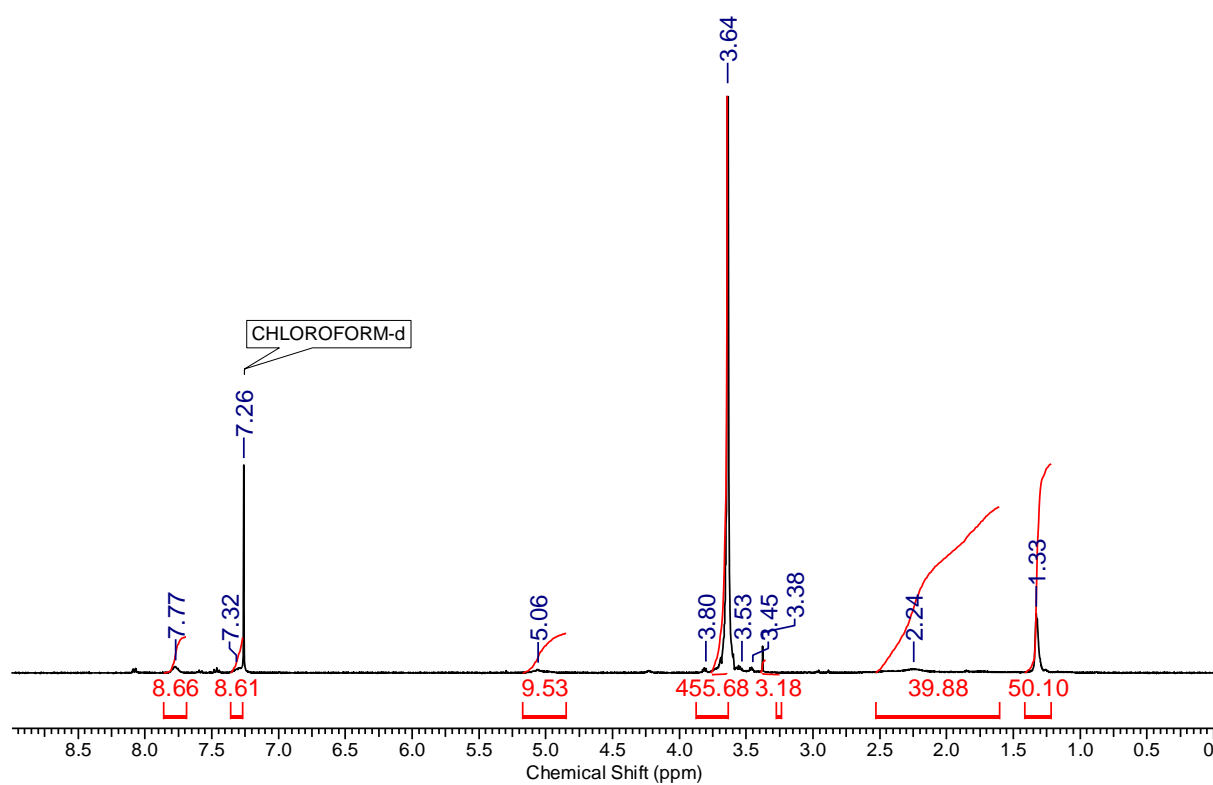

**Figure S3.** <sup>1</sup>H NMR spectrum (400 MHz, CDCl<sub>3</sub>) of ABC2 (PEG<sub>114</sub>-PTBA<sub>5</sub>).

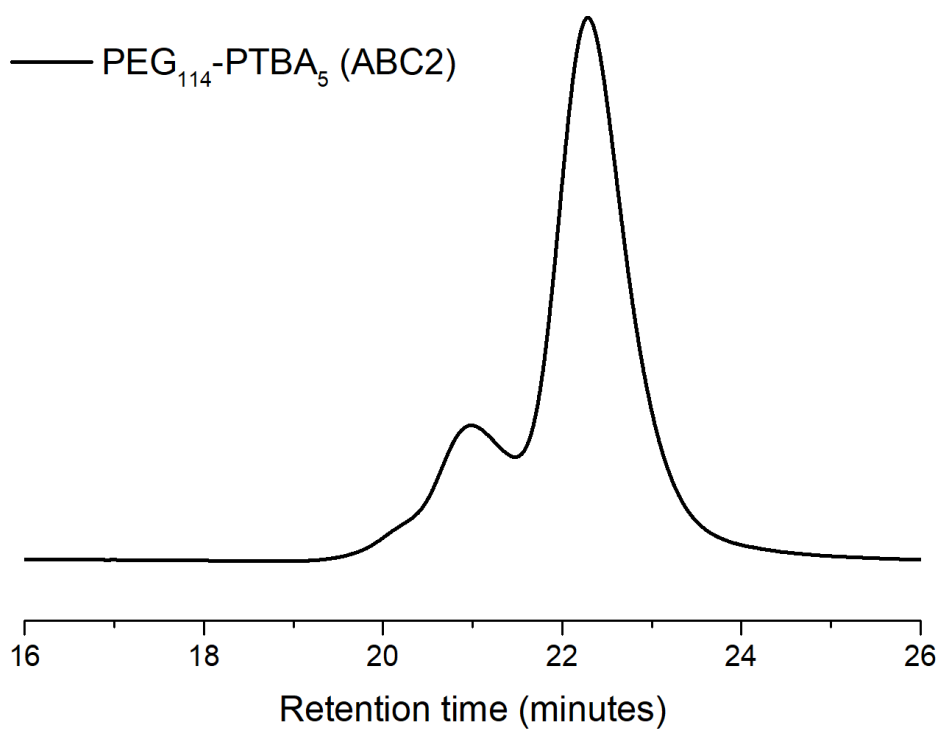

**Figure S4.** GPC trace of PEG<sub>114</sub>-PTBA<sub>5</sub> (ABC2,  $M_n = 13,500$  g/mol,  $\bar{D} = 1.12$ ) (DMF GPC, PMMA standards).



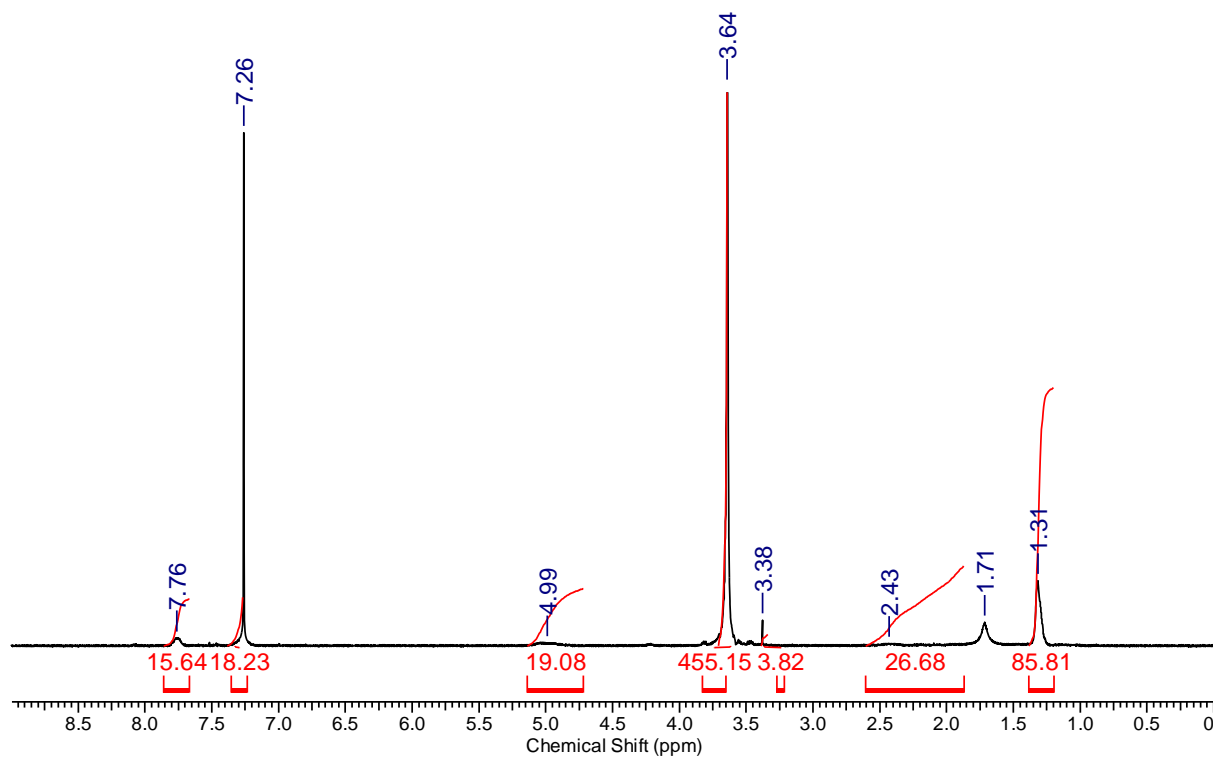

**Figure S5.** <sup>1</sup>H NMR spectrum (400 MHz, CDCl<sub>3</sub>) of ABC3 (PEG<sub>114</sub>-PTBA<sub>9</sub>).

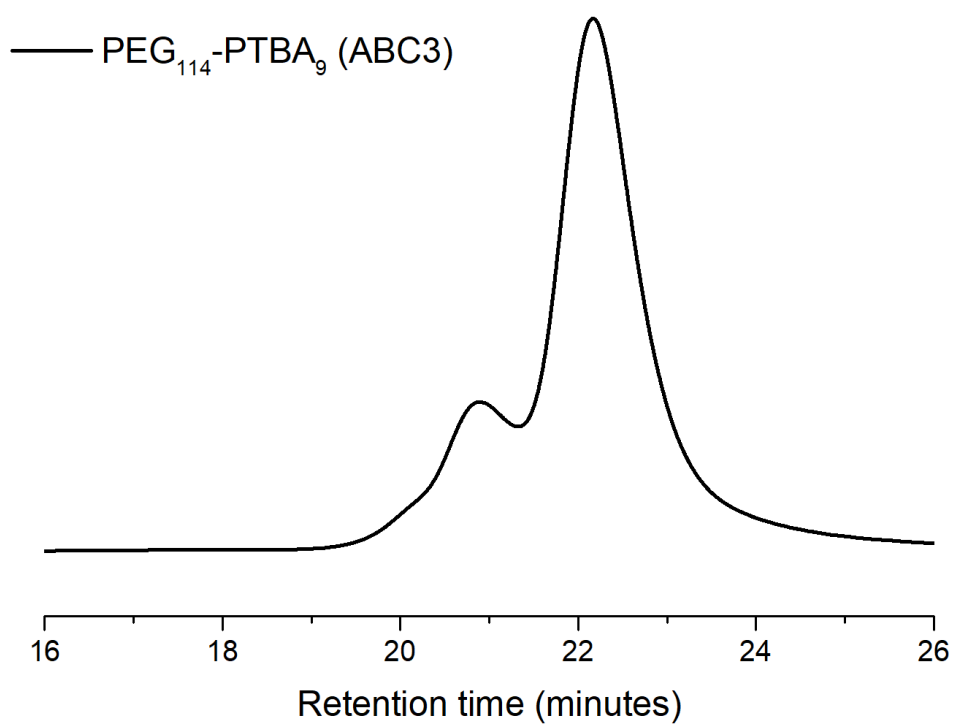

**Figure S6.** GPC trace of PEG<sub>114</sub>-PTBA<sub>9</sub> (ABC3,  $M_n = 13,900$  g/mol,  $D = 1.14$ ) (DMF GPC, PMMA standards).



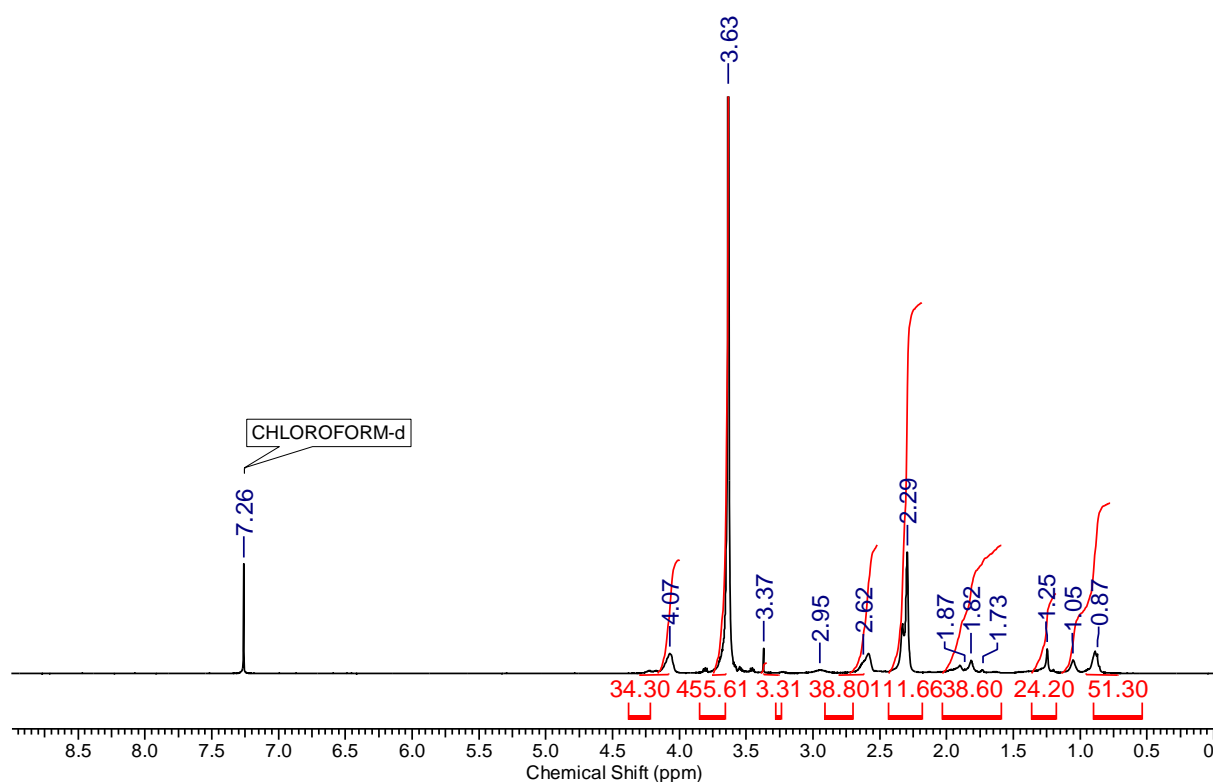

**Figure S7.**  $^1\text{H}$  NMR spectrum (400 MHz,  $\text{CDCl}_3$ ) of ABC4 ( $\text{PEG}_{114}\text{-PDMAEMA}_{17}\text{-RAFT}$ ).

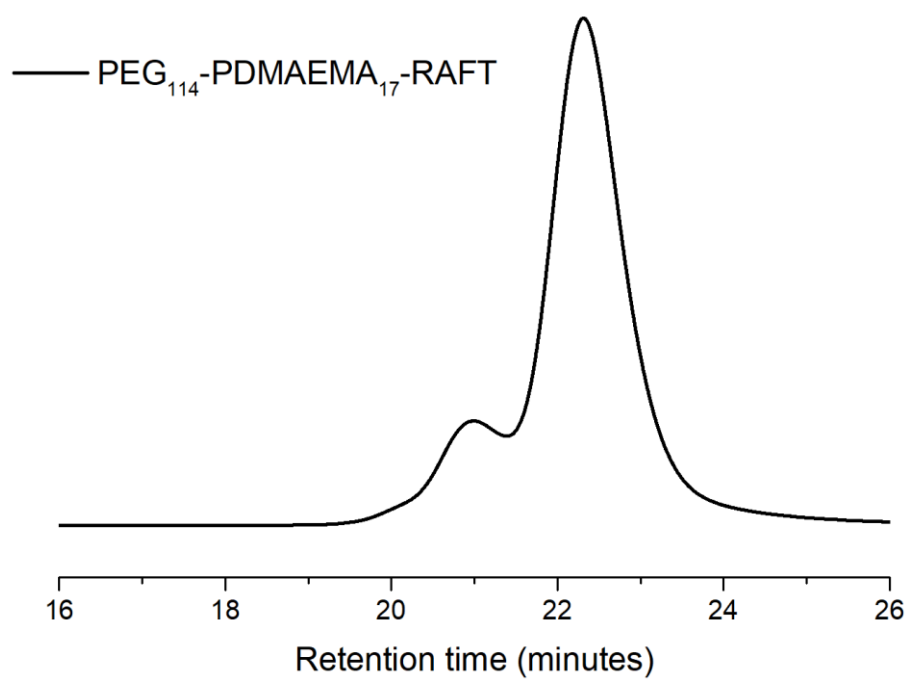

**Figure S8.** GPC trace of  $\text{PEG}_{114}\text{-PDMAEMA}_{17}\text{-RAFT}$  (ABC4,  $M_n = 12,700$  g/mol,  $D = 1.17$ ) (DMF GPC, PMMA standards).



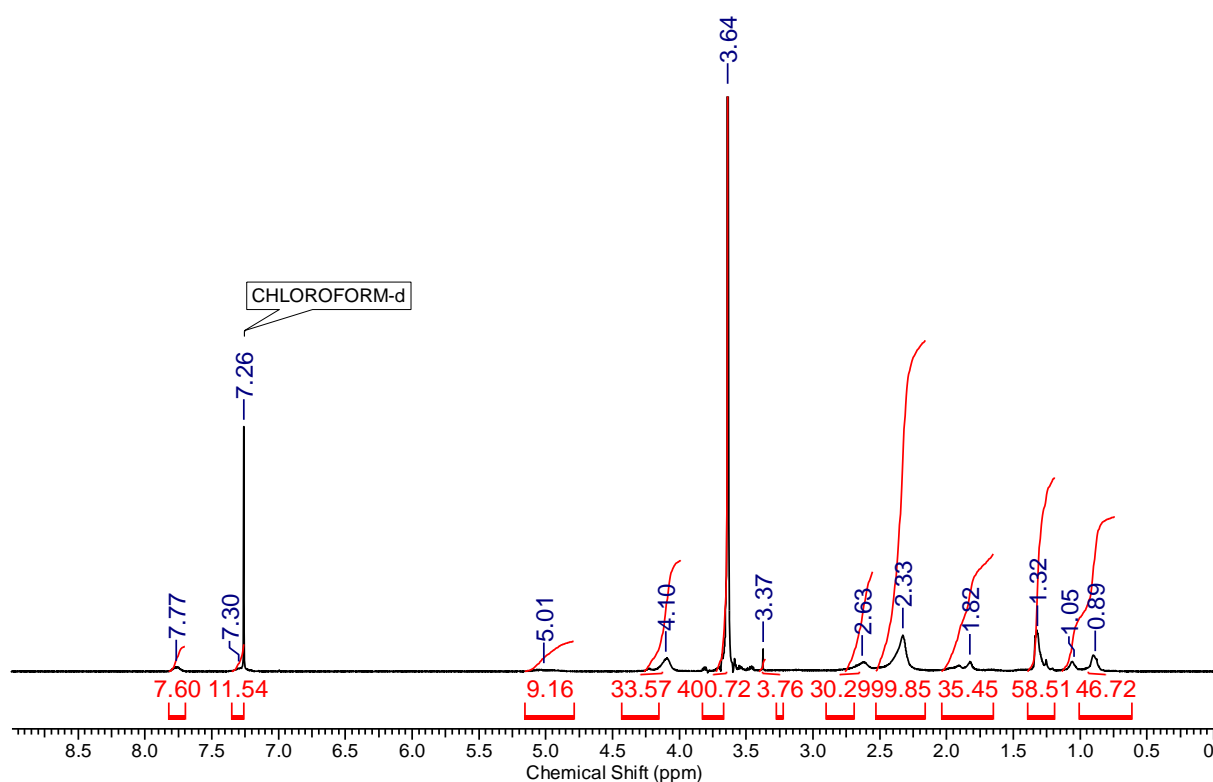

**Figure S9.**  $^1\text{H}$  NMR spectrum (400 MHz,  $\text{CDCl}_3$ ) of ABC5 ( $\text{PEG}_{114}\text{-PDMAEMA}_{17}\text{-PTBA}_5\text{-RAFT}$ ).

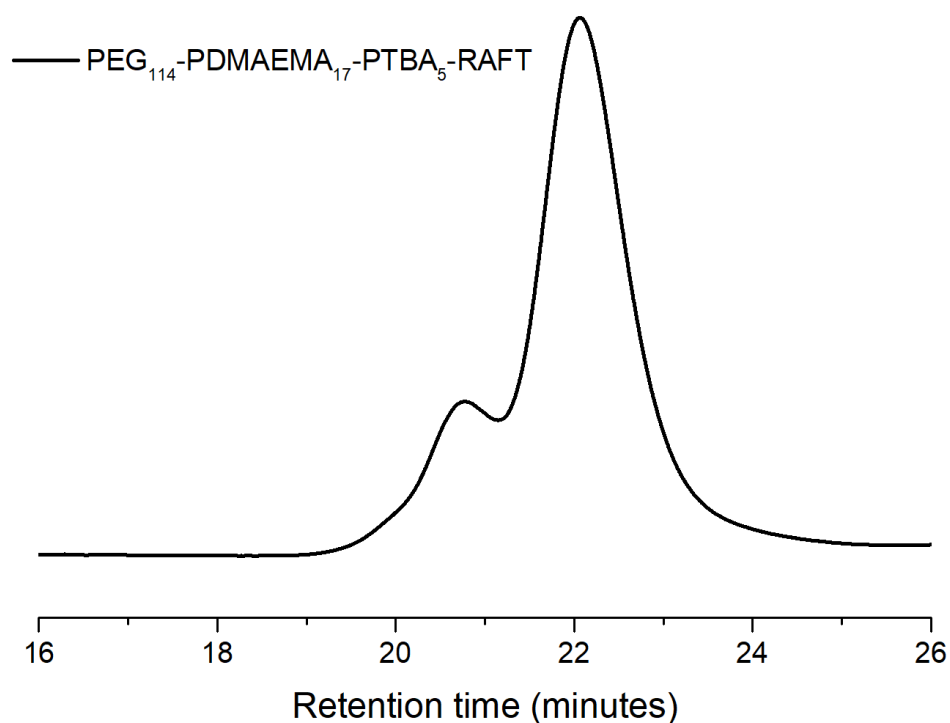

**Figure S10.** GPC trace of  $\text{PEG}_{114}\text{-PDMAEMA}_{17}\text{-PTBA}_5\text{-RAFT}$  (ABC5,  $M_n = 14,500$  g/mol,  $D = 1.13$ ) (DMF GPC, PMMA standards).



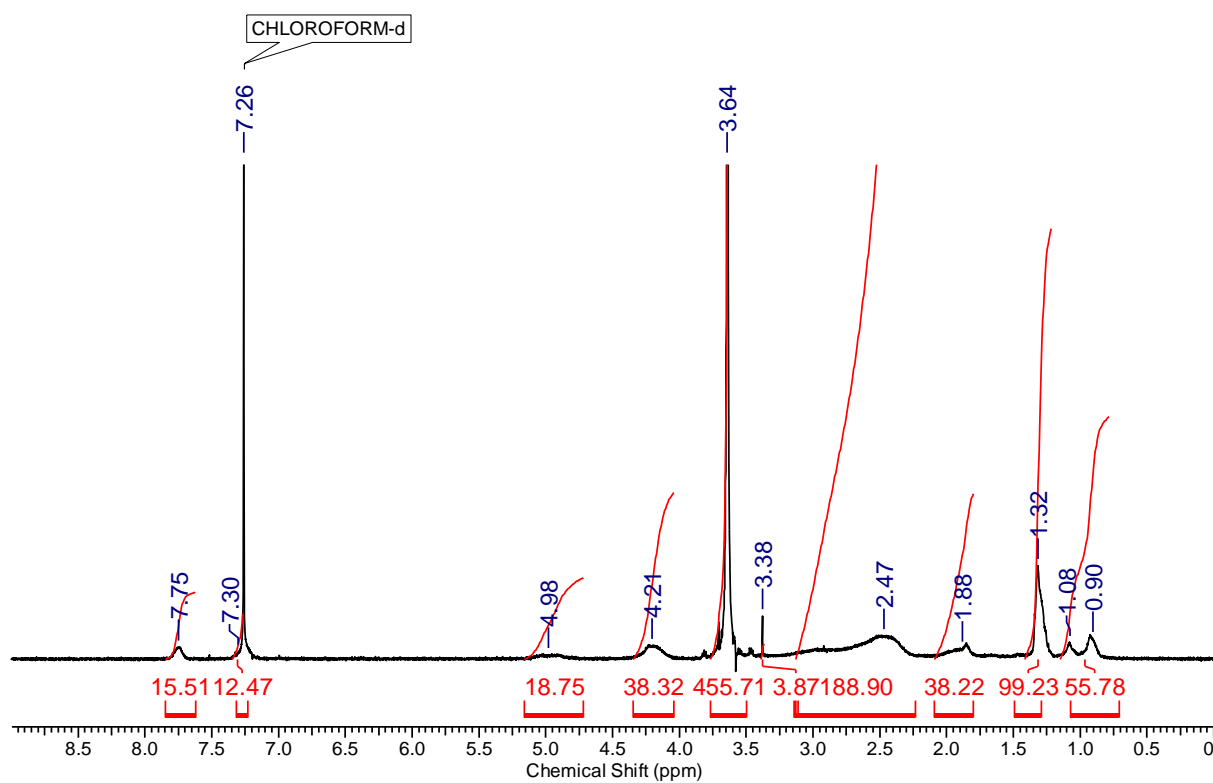

**Figure S11.**  $^1\text{H}$  NMR spectrum (400 MHz,  $\text{CDCl}_3$ ) of ABC6 ( $\text{PEG}_{114}\text{-PDMAEMA}_{17}\text{-PTBA}_9\text{-RAFT}$ ).

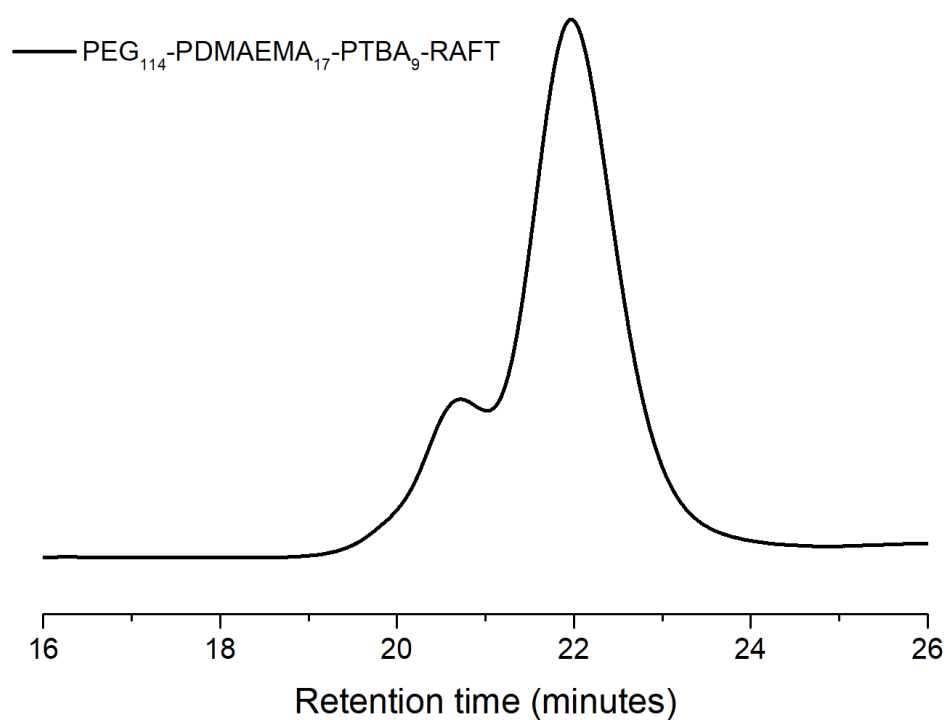

**Figure S12.** GPC trace of  $\text{PEG}_{114}\text{-PDMAEMA}_{17}\text{-PTBA}_9\text{-RAFT}$  (ABC6,  $M_n = 15,300$  g/mol,  $D = 1.14$ ) (DMF GPC, PMMA standards).



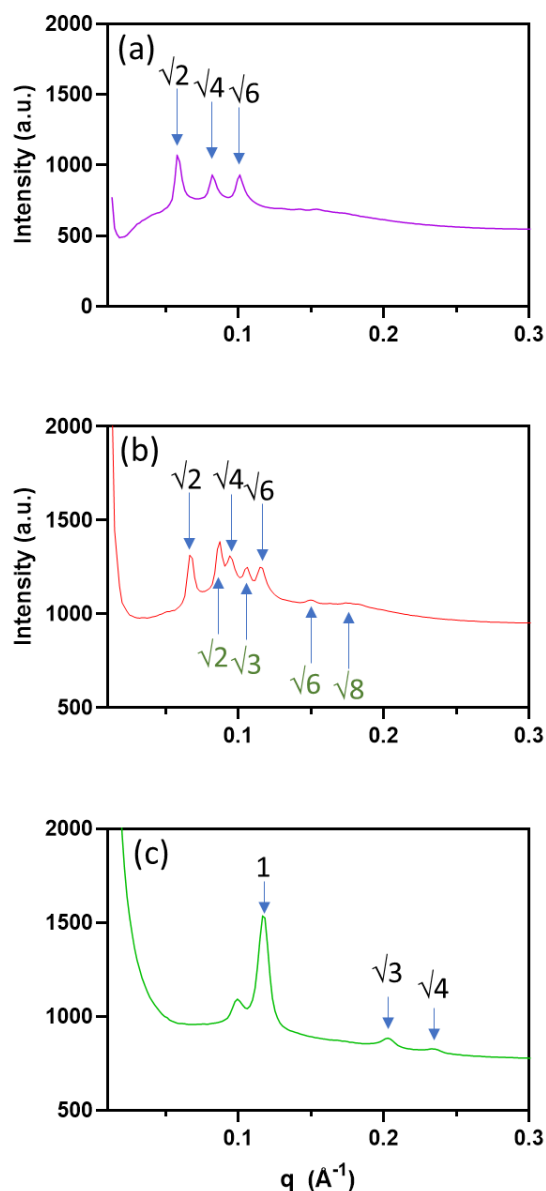

**Figure S13.** (a) The primitive cubic ( $Q_{II}^P$ ) phase with symmetry group  $Im3m$  was identified by the peak spacing ratios of  $\sqrt{2}$ ,  $\sqrt{4}$ ,  $\sqrt{6}$ , illustrated by the sample stabilized with 0.5 mol% ABC3 at pH 7. (b) The sample stabilized with 0.5 mol% ABC5 at pH 7 exhibited a mixed cubic phase of  $Q_{II}^P$  as well as the double diamond cubic ( $Q_{II}^D$ ) phase with symmetry group  $Pn3m$ , which was identified by the peak spacing ratios of  $\sqrt{2}$ ,  $\sqrt{3}$ ,  $\sqrt{6}$ ,  $\sqrt{8}$ . (c) The sample stabilized with 3.0 mol% ABC4 at pH 7 exhibited a mixed  $Q_{II}^D$  phase (a small peak was visible) and the hexagonal ( $H_{II}$ ) phase, which was identified by the peak spacing ratios of 1,  $\sqrt{3}$ ,  $\sqrt{4}$ .



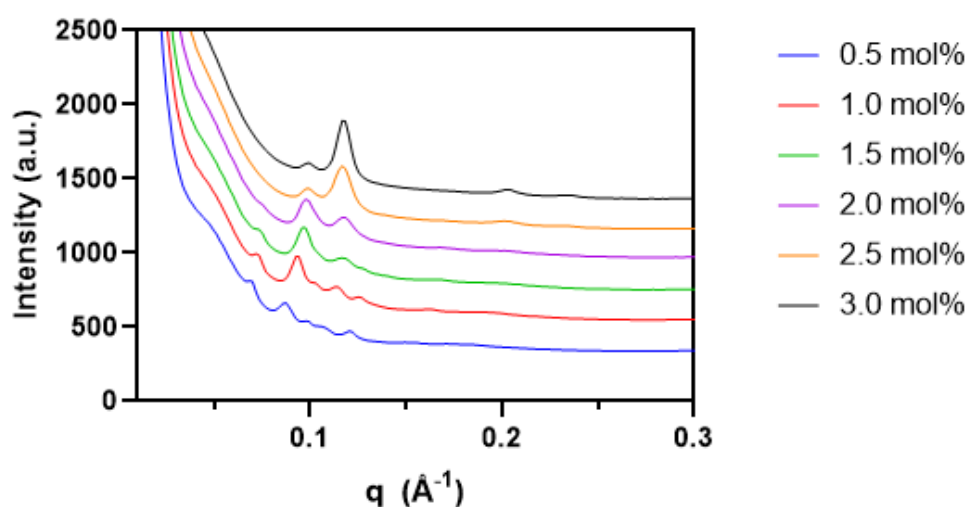

**Figure S14.** SAXS diffraction patterns of MO nanoparticles stabilized by ABC4 polymer at various concentrations after incubation with 50 mM H<sub>2</sub>O<sub>2</sub> solution for one hour. Measurements were performed at 25 °C.

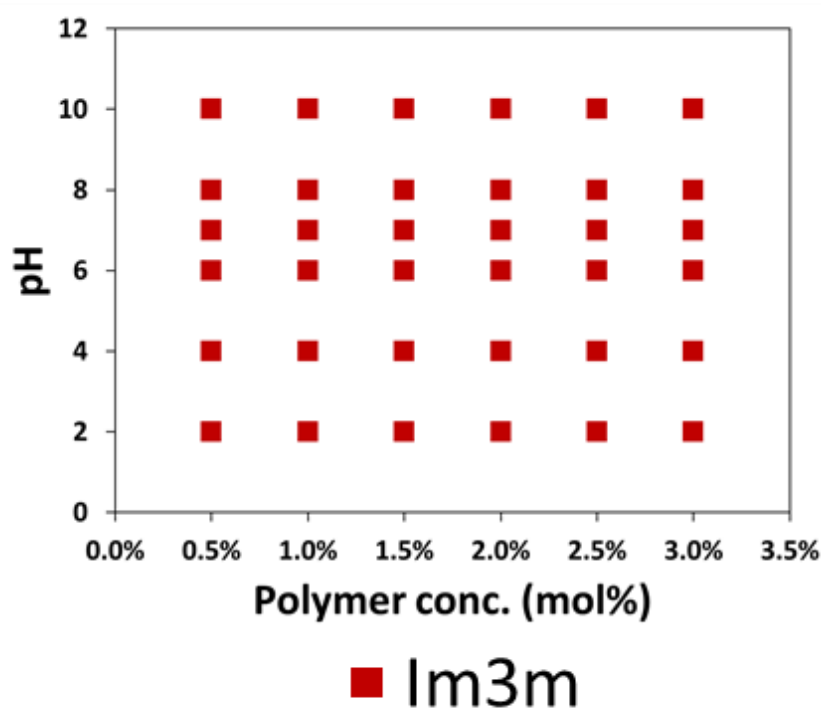

**Figure S15.** Mesophases of MO nanoparticles stabilized by ABC3 (the polymer without the pH-responsive PDMAEMA) at various concentrations in pH 2 to 10. All measurements were performed at 25 °C.
